# Supplementary material for: Evaluating Carbon Sink Potential of Forest Ecosystems under Different Climate Change Scenarios in Yunnan, Southwest China
Source: MDPI journal article supplement (doi:10.3390/rs15051442), 2023-03-04
Supplement: s1 [file s1]

Table S1 Physiological and ecological parameters of the nine basic types of trees in the model

| Parameters       | Rainforest           |                      | Evergreen Broadleaf  |                      | Deciduous Broadleaf  |                      | Evergreen Needleleaf |                      | Deciduous<br>Needleleaf |
|------------------|----------------------|----------------------|----------------------|----------------------|----------------------|----------------------|----------------------|----------------------|-------------------------|
|                  | Shade<br>tolerance   | Shade<br>intolerance | Shade<br>tolerance   | Shade<br>intolerance | Shade<br>tolerance   | Shade<br>intolerance | Shade<br>tolerance   | Shade<br>intolerance |                         |
| L <sub>o</sub>   | 5.5                  | 11.0                 | 5.5                  | 11.0                 | 5.5                  | 11.0                 | 5.5                  | 11.0                 | 11.0                    |
| Am               | 5.5×10 <sup>-4</sup> | 5.5×10 <sup>-4</sup> | 5.5×10 <sup>-4</sup> | 5.5×10 <sup>-4</sup> | 5.0×10 <sup>-4</sup>    |
| Sl               | 1.3×10 <sup>-5</sup>    |
| Kl               | 4.5×10 <sup>-1</sup> | 4.5×10 <sup>-1</sup> | 4.5×10 <sup>-1</sup> | 4.5×10 <sup>-1</sup> | 4.0×10 <sup>-1</sup> | 4.0×10 <sup>-1</sup> | 4.0×10 <sup>-1</sup> | 4.0×10 <sup>-1</sup> | 3.5×10 <sup>-1</sup>    |
| r <sub>L</sub>   | 2.0×10 <sup>-3</sup> | 2.0×10 <sup>-3</sup> | 2.0×10 <sup>-3</sup> | 2.0×10 <sup>-3</sup> | 6.0×10 <sup>-3</sup> | 3.0×10 <sup>-3</sup> | 3.5×10 <sup>-3</sup> | 3.5×10 <sup>-3</sup> | 1.2×10 <sup>-2</sup>    |
| r <sub>W</sub>   | 1.0×10 <sup>-3</sup> | 1.0×10 <sup>-3</sup> | 1.0×10 <sup>-3</sup> | 1.0×10 <sup>-3</sup> | 2.0×10 <sup>-3</sup>    |
| r <sub>R</sub>   | 1.5×10 <sup>-3</sup> | 1.5×10 <sup>-3</sup> | 1.5×10 <sup>-3</sup> | 1.5×10 <sup>-3</sup> | 2.5×10 <sup>-3</sup>    |
| lm <sub>2</sub>  | 0.50                 | 0.50                 | 0.40                 | 0.40                 | 0.40                 | 0.40                 | 0.50                 | 0.50                 | 0.50                    |
| CN <sub>L</sub>  | 40.0                 | 40.0                 | 45.0                 | 45.0                 | 40.0                 | 40.0                 | 60.0                 | 60.0                 | 50.0                    |
| CN <sub>W</sub>  | 200.0                | 200.0                | 200.0                | 200.0                | 200.0                | 200.0                | 200.0                | 200.0                | 200.0                   |
| CN <sub>R</sub>  | 40.0                 | 40.0                 | 45.0                 | 45.0                 | 40.0                 | 40.0                 | 60.0                 | 60.0                 | 50.0                    |
| H <sub>max</sub> | 40.0                 | 60.0                 | 50.0                 | 40.0                 | 40.0                 | 40.0                 | 60.0                 | 60.0                 | 50.0                    |
| D <sub>max</sub> | 2.0                  | 3.0                  | 2.0                  | 1.5                  | 2.0                  | 1.5                  | 2.0                  | 2.0                  | 2.0                     |
| A <sub>max</sub> | 200.0                | 100.0                | 400.0                | 200.0                | 400.0                | 200.0                | 1000.0               | 300.0                | 500.0                   |

|            |                      |                      |                      |                      |                      |                      |                      |                      |                      |
|------------|----------------------|----------------------|----------------------|----------------------|----------------------|----------------------|----------------------|----------------------|----------------------|
| $e_L$      | 600.0                | 600.0                | 600.0                | 600.0                | 200.0                | 700.0                | 700.0                | 700.0                | 300.0                |
| $e_R$      | 20.0                 | 20.0                 | 20.0                 | 20.0                 | 30.0                 | 30.0                 | 15.0                 | 15.0                 | 28.0                 |
| $cLAI_L$   | 15.0                 | 15.0                 | 15.0                 | 15.0                 | 45.0                 | 20.0                 | 18.0                 | 18.0                 | 40.0                 |
| $A_{stem}$ | 350.0                | 350.0                | 350.0                | 350.0                | 350.0                | 350.0                | 350.0                | 350.0                | 350.0                |
| $T_{min}$  | 5.0                  | 5.0                  | 3.0                  | 1.0                  | -1.0                 | -5.5                 | -5.5                 | -2.5                 | -5.5                 |
| $T_{opt}$  | 27.0                 | 29.0                 | 27.0                 | 25.0                 | 23.0                 | 20.0                 | 18.0                 | 23.0                 | 16.0                 |
| $T_{max}$  | 50.0                 | 50.0                 | 50.0                 | 50.0                 | 45.0                 | 45.0                 | 40.0                 | 40.0                 | 35.0                 |
| $DRY$      | 1.0                  | 0.8                  | 0.9                  | 0.8                  | 0.8                  | 0.6                  | 0.9                  | 0.7                  | 0.5                  |
| $l_L$      | $2.0 \times 10^{-3}$ | $2.0 \times 10^{-3}$ | $2.0 \times 10^{-3}$ | $2.0 \times 10^{-3}$ | $1.1 \times 10^{-4}$ | $1.1 \times 10^{-4}$ | $2.0 \times 10^{-3}$ | $2.0 \times 10^{-3}$ | $1.1 \times 10^{-4}$ |
| $L_r/N_r$  | 40.0                 | 40.0                 | 40.0                 | 40.0                 | 30.0                 | 50.0                 | 80.0                 | 80.0                 | 50.0                 |
| $l_R$      | $5.0 \times 10^{-5}$ | $5.0 \times 10^{-5}$ | $5.0 \times 10^{-5}$ | $5.0 \times 10^{-5}$ | $4.0 \times 10^{-5}$ | $4.0 \times 10^{-5}$ | $8.0 \times 10^{-5}$ | $8.0 \times 10^{-5}$ | $8.0 \times 10^{-5}$ |

where  $L_o$  is the light compensation point ( $W/m^2$ );  $A_m$  is the maximum photosynthesis [ $kg\ C/(m^2 \cdot h)$ ];  $Sl$  is the initial slope of the light intensity-photosynthesis curve [ $kg\ C/(m^2 \cdot h)/(W/m^2)$ ];  $Kl$  is the canopy leaf extinction coefficient;  $r_L$  is the leaf relative respiration rate (1/d);  $r_w$  is the wood relative respiration rate (1/d);  $r_R$  is the root relative respiration rate (1/d);  $lm_2$  is the fruit drop threshold;  $CN_L$  is the leaf carbon to nitrogen ratio;  $CN_w$  is the wood carbon to nitrogen ratio;  $CN_R$  is the root carbon to nitrogen ratio;  $H_{max}$  is the maximum tree height (m);  $D_{max}$  is the maximum tree diameter at breast height (m);  $A_{max}$  is the maximum tree age (a);  $e_L$  is the leaf volume coefficient ( $kg\ C/m^3$ );  $e_R$  is the root volume coefficient ( $kg\ C/m^3$ );  $cLAI_L$  is the leaf area coefficient ( $m^2/kg\ C$ );  $A_{stem}$  is wood weight ( $kg\ C/m^3$ );  $T_{min}$  is minimum photosynthetic temperature ( $^{\circ}C$ );  $T_{opt}$  is optimum photosynthetic temperature ( $^{\circ}C$ );  $T_{max}$  is maximum photosynthetic temperature ( $^{\circ}C$ );  $DRY$  is drought tolerance;  $l_L$  is relative rate of leaf drop (1/d);  $L_r/N_r$  is the ratio of lignin to nitrogen content;  $l_R$  is relative rate of root drop (1/d).
